# Supplementary material for: Amorphous titanic acid electrode: its electrochemical storage of ammonium in a new water-in-salt electrolyte
Source: Royal Society of Chemistry journal article supplement (doi:10.1039/c8cc04713h), 2018-01-01
Supplement: c8cc04713h1.pdf [file c8cc04713h1.pdf]

*Electronic Supplementary Information*

**Amorphous Titanic Acid Electrode: Its Electrochemical Storage of  
Ammonium in a New Water-in-Salt Electrolyte**

John J. Holoubek, Heng Jiang, Daniel Leonard, Yitong Qi, Galo C. Bustamante, Xiulei Ji\*

*Department of Chemistry, Oregon State University, Corvallis, Oregon, United States, 97331*

Email: [david.ji@oregonstate.edu](mailto:david.ji@oregonstate.edu)

## Experimental

### Synthesis of Materials

The synthesis of the precursor  $\text{Ti}(\text{OH})_4$  was performed in a similar method to literature.<sup>10</sup> In a typical synthesis, 1 mL  $\text{TiCl}_4$  was added to 50 mL of DI water slowly under constant stirring. An aqueous ammonia solution was then added dropwise until the pH reached 9, yielding a  $\text{Ti}(\text{OH})_4$  gel mixture. The particles were then separated by centrifuge, which were calcined at 110 °C and 450 °C for 12 hours, yielding  $\text{TiO}_{1.85}(\text{OH})_{0.30} \cdot 0.28\text{H}_2\text{O}$  and  $\text{TiO}_2$  anatase powder, respectively.

### Materials Characterization

The crystal structure of all materials was characterized by powder X-ray diffraction (XRD) using  $\text{Cu K}\alpha$  radiation ( $\lambda = 1.5406 \text{ \AA}$ ) in a Rigaku Ultima IV Diffractometer. The morphologies were determined using scanning electron microscopy (SEM) using a FEI NOVA 230 high resolution scanning electron microscope. Thermal gravimetric analysis (TGA) was performed on a Shimadzu TGA-50 instrument in air at a temperature ramp of  $5 \text{ }^\circ\text{C min}^{-1}$  from room temperature to 700 °C. Fourier transform infrared spectroscopy (FT-IR) spectra were obtained using a Nicolet™ iS™ 10 spectrometer on powder samples and free-standing film electrodes. Brunauer–Emmett–Teller (BET) analysis was conducted in a Micromeritics TriStar II instrument using  $\text{N}_2$  at an isotherm of 77.3 K. Density measurements were performed on a Mettler Toledo XS64 balance using the Archimedes Principle. pH measurements were done on a Schott Instruments Lab 850 pH probe, which was calibrated using pH = 4 and pH = 7 buffers prior to testing.

### Electrochemical Characterization

All the half-cell tests were performed in three-electrode Swagelok configuration cells using an aluminum and titanium rod as the negative and positive current collectors, respectively. The working electrode was prepared by mixing active material ( $\text{TiO}_{1.85}(\text{OH})_{0.30} \cdot 0.28\text{H}_2\text{O}$  or  $\text{TiO}_2$ ), super P carbon-45 (TIMCAL) and polyvinylidene fluoride with a mass ratio of 7:2:1 in N-Methyl-2-pyrrolidone (NMP). The homogeneous slurry was then cast on aluminum foil followed by drying at 80 °C for 12 h. The active mass loading was approximately  $1.3 \text{ mg cm}^{-2}$ . Activated carbon (AC) free-standing film electrodes were prepared by mixing AC, super P carbon-45 (TIMCAL), and polytetrafluoroethylene (PTFE) with a mass ratio of 7:2:1 in 2-propanol followed by rolling for use

as the counter electrode. Free-standing electrodes used in Ex-Situ FTIR measurements were prepared using the same method, replacing AC with the active material to be tested (titanic acid/TiO<sub>2</sub>). An Ag/AgCl electrode (saturated KCl) was used as the reference electrode, with filter paper as the separator. All electrodes were stored in a desiccator in between testing.

Cyclic voltammetry (CV) was carried out on an EC-Lab VMP3 instrument. Galvanostatic charge/discharge (GCD) measurements were conducted on both EC-Lab VMP3, and Maccor 3000 systems. All electrolyte stability tests were performed in beaker cells with AC electrodes housed in titanium mesh as a counter electrode. The working electrode was aluminum foil for negative potentials, and titanium foil for positive potentials, using an Ag/AgCl reference electrode. The capacitive contribution of the CV curves was calculated in accordance with literature.<sup>27</sup>

Electrolyte conductivity experiments were carried out using electrochemical impedance spectroscopy (EIS) on a Biologic EC-Lab VMP3. The test cell consisted of two parallel copper foil electrodes on either side of a 1 cm x 1 cm x 0.5 cm electrolyte reservoir. The room temperature (25 °C) electrolytes were transferred to the test cell tested at a frequency range of 200 kHz to 100 Hz. The uncompensated resistance from the Nyquist plot was assumed to be dominated by electrolyte resistance and used to calculate conductivity.

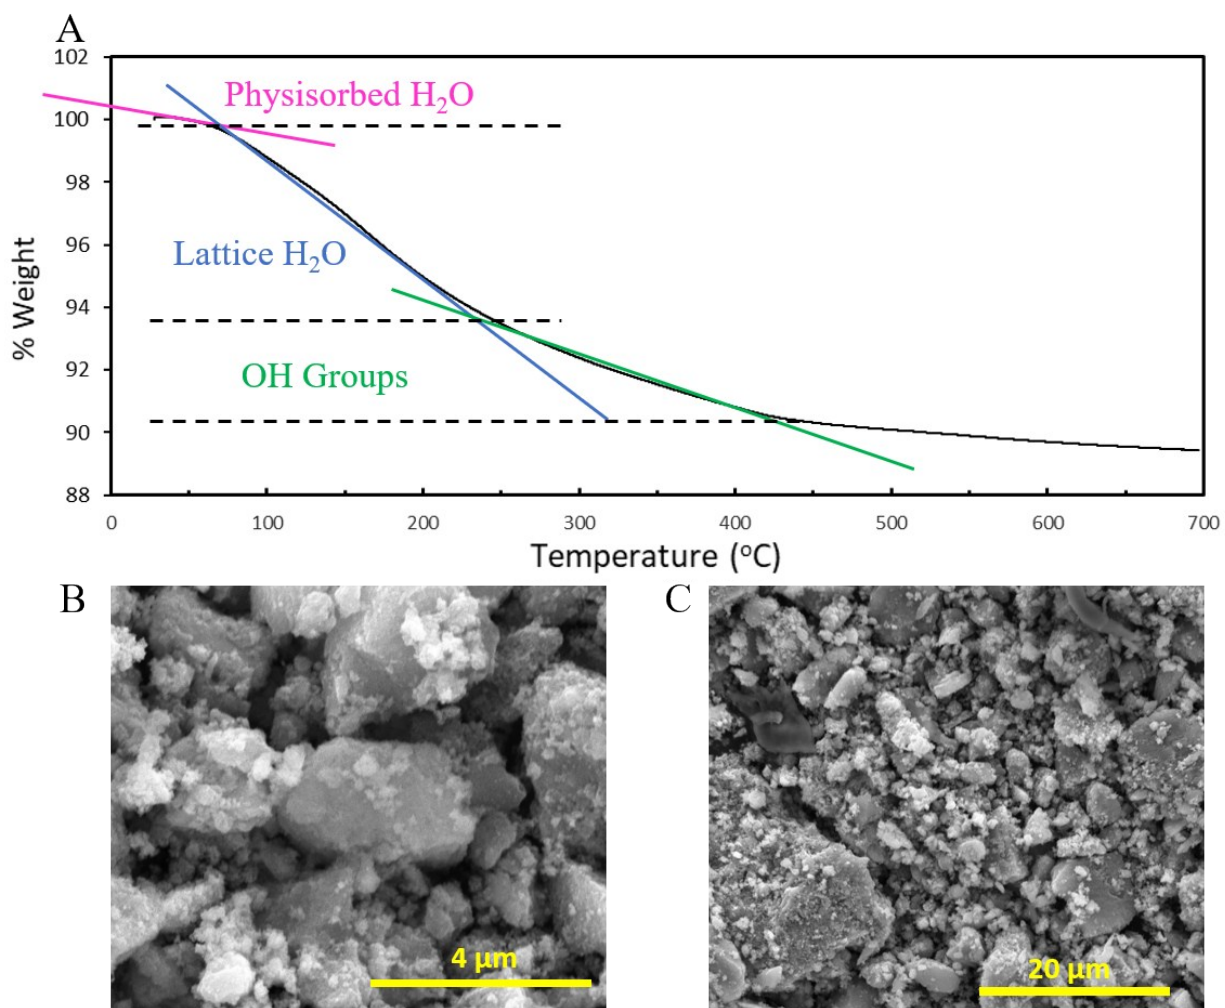

**Figure S1.** (A) TGA of the titanic acid powder at a temperature ramp of 5 °C min<sup>-1</sup> in air. (B, C) SEM images of the titanic acid sample at various magnifications.

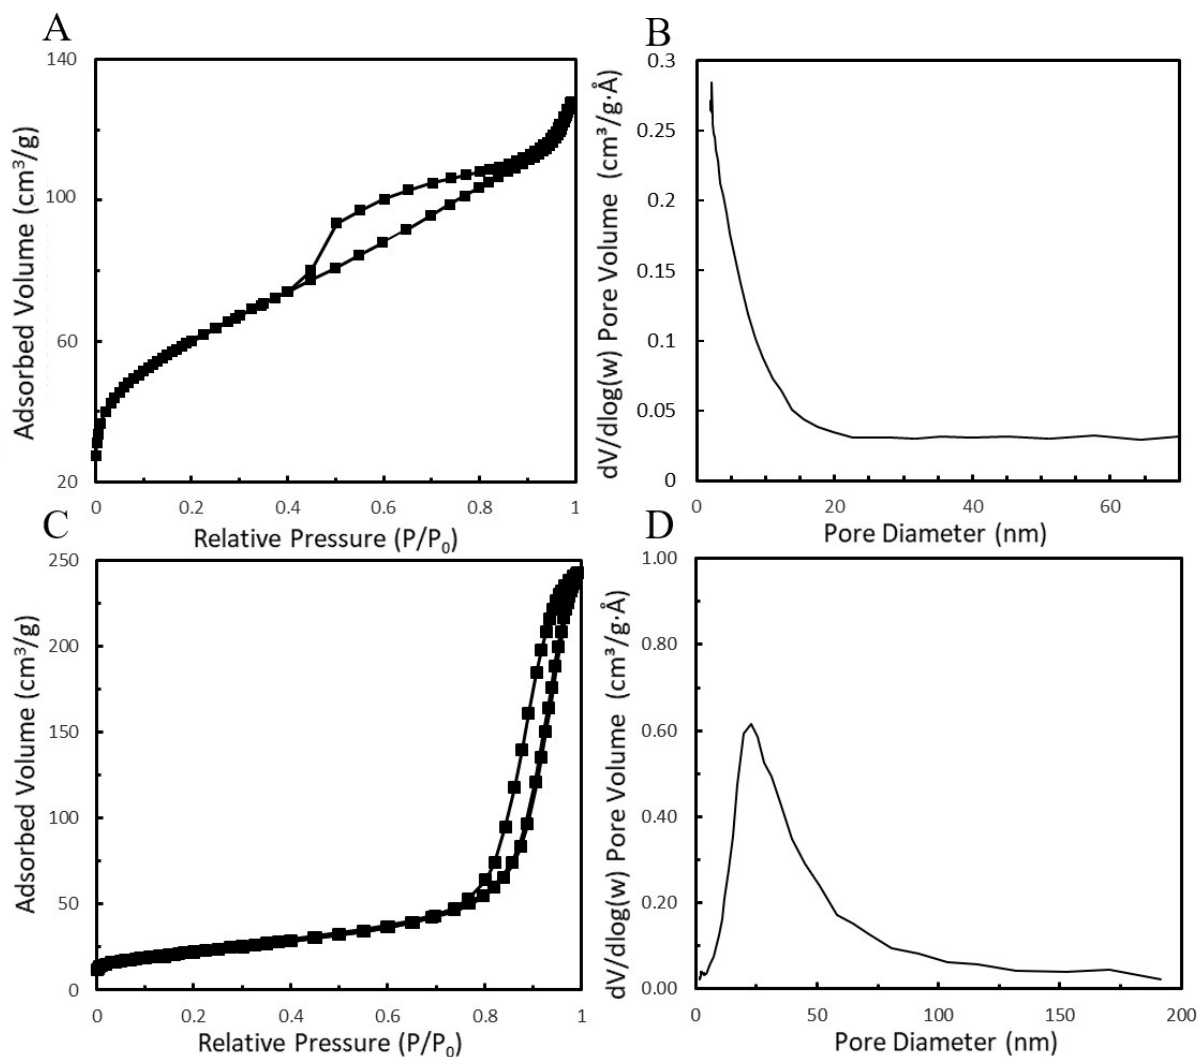

**Figure S2.** BET data of titanic acid and TiO<sub>2</sub> samples (A) N<sub>2</sub> absorption/desorption isotherms of titanic acid. (B) Pore size distribution of titanic acid. (C) N<sub>2</sub> absorption/desorption isotherms of TiO<sub>2</sub>. (D) Pore size distribution of TiO<sub>2</sub>.

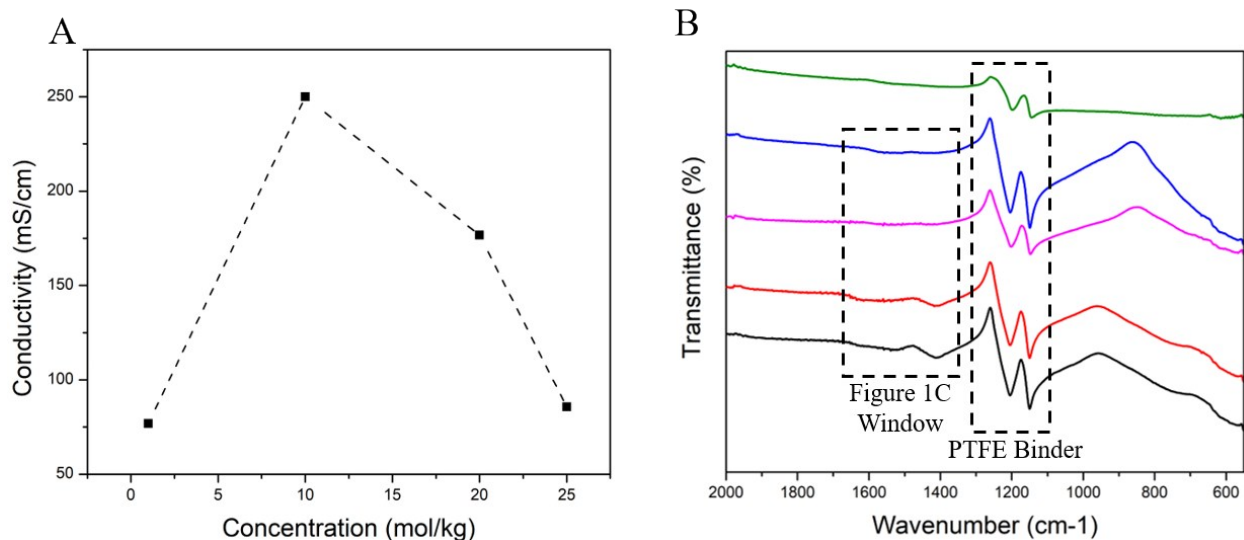

**Figure S3.** (A) Room-temperature conductivity of the AmAc electrolyte at various concentrations. (B) FTIR spectra of the (i) pristine C45/PTFE film electrode, (ii) pristine TiO<sub>2</sub> film electrode, (iii) ammoniated TiO<sub>2</sub> film electrode, (iv) pristine titanitic acid film electrode, (v) ammoniated titanitic acid electrode.

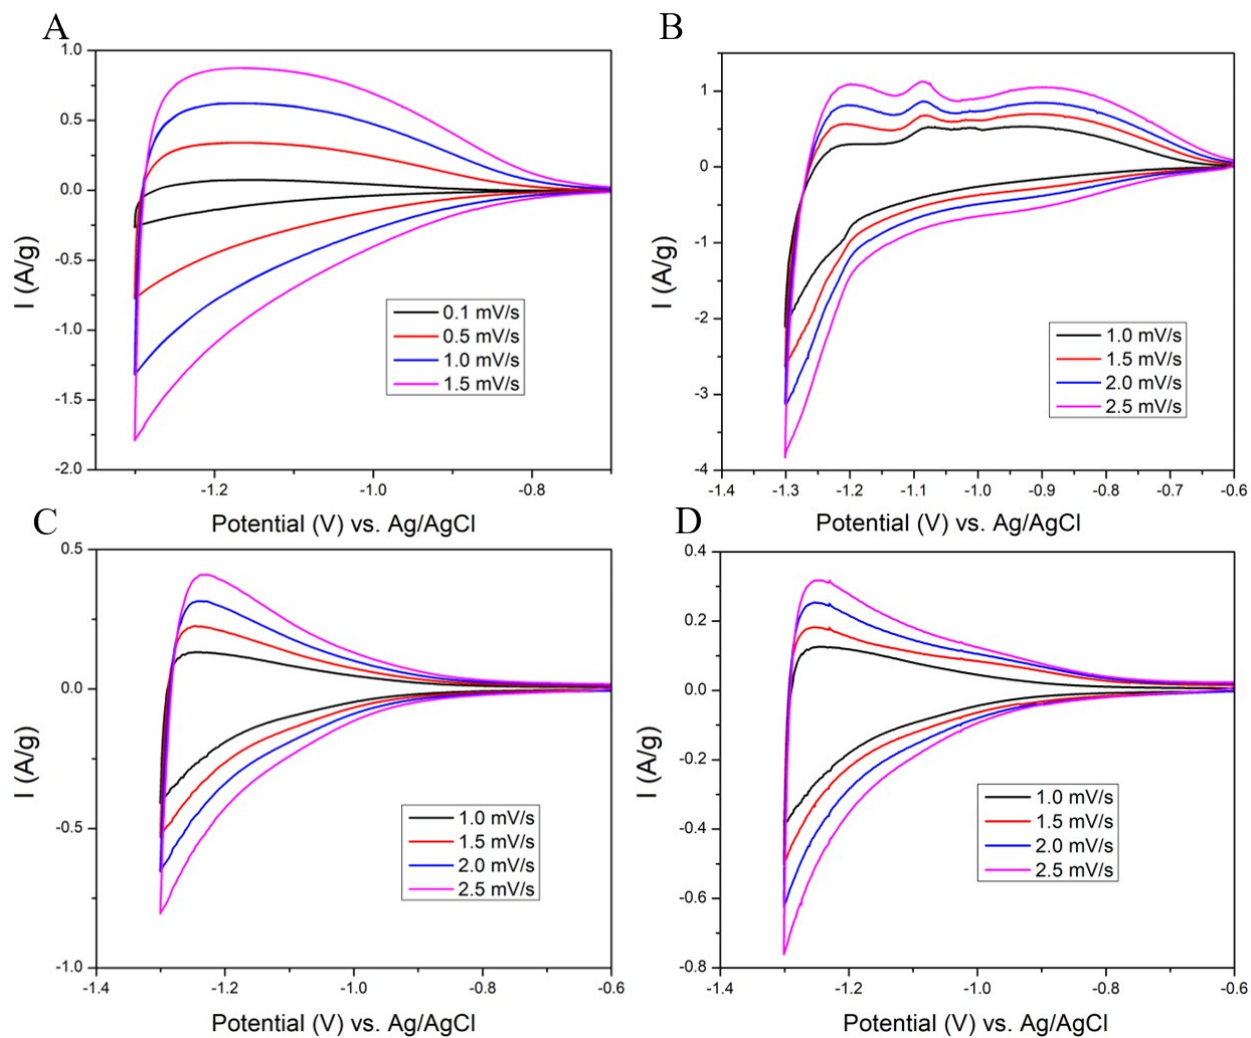

**Figure S4.** CV curves for the titanic acid electrode at various scan rates in (A) 25 m AmAc, (B) 1 M AmAc. CV curves for the  $\text{TiO}_2$  electrodes at various scan rates in (C) 25 m AmAc, (D) 1 M AmAc.

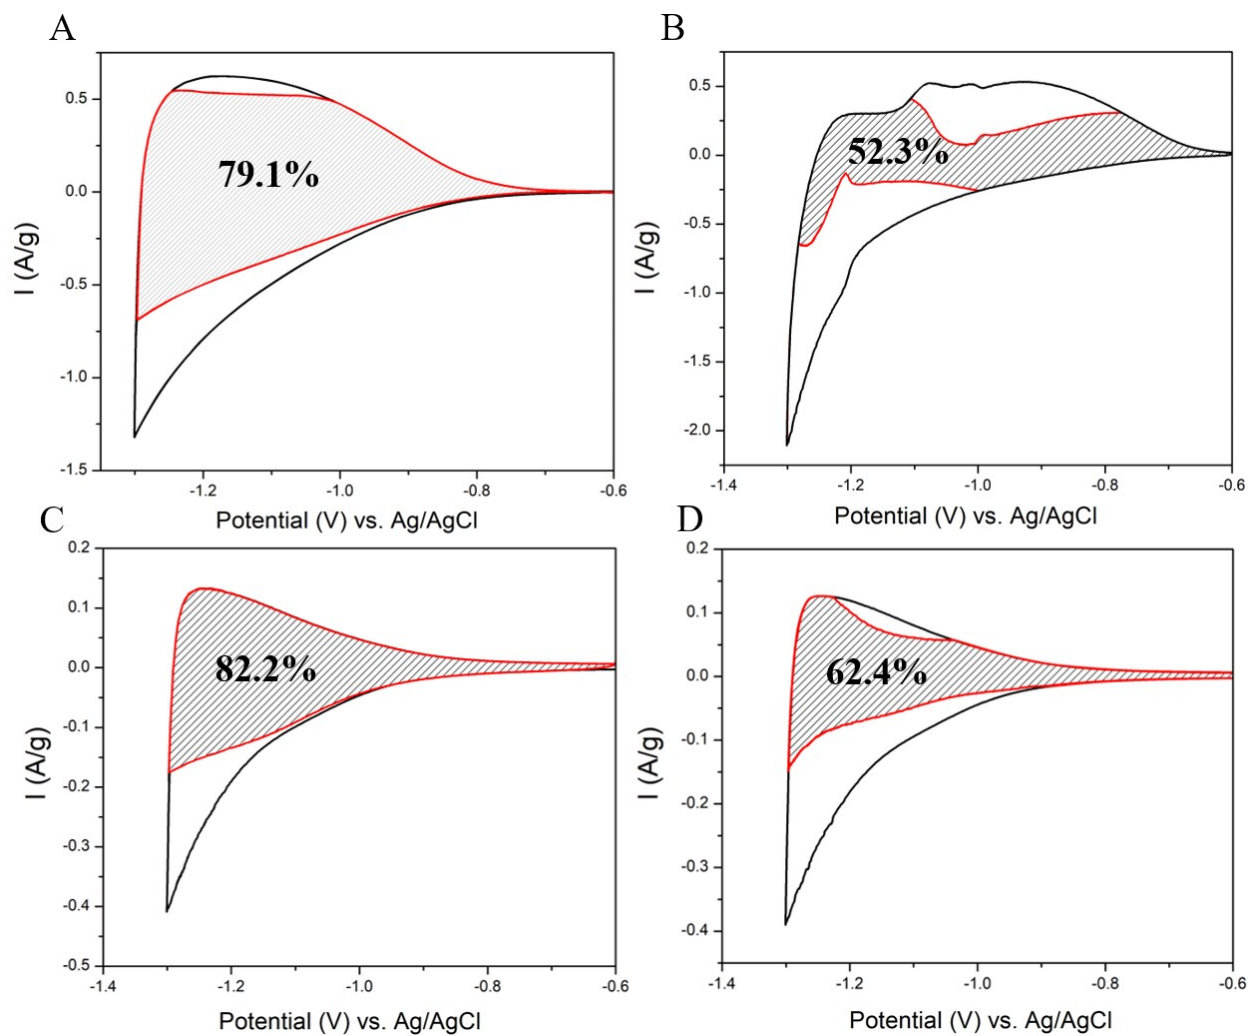

**Figure S5.** Capacitive current contribution of the titanate acid electrode in (A) 25 m AmAc, (B) 1 M AmAc at  $1 \text{ mV s}^{-1}$ . Capacitive current contribution of the  $\text{TiO}_2$  electrode in (C) 25 m AmAc, (D) 1 M AmAc at  $1 \text{ mV s}^{-1}$ .
